RESEARCH ARTICLE

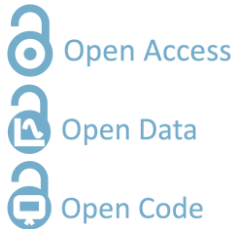

Open Access

Open Data

Open Code

# Modelling the impact of the macroalgae *Asparagopsis taxiformis* on rumen microbial fermentation and methane production

Rafael Muñoz-Tamayo<sup>1\*</sup> , Juana C. Chagas<sup>2</sup>, Mohammad Ramin<sup>2</sup>, and Sophie J. Krizsan<sup>2</sup>

\*Correspondence:  
Rafael.munoz-tamayo@inrae.fr

<sup>1</sup> Université Paris-Saclay, INRAE, AgroParisTech, UMR Modélisation Systémique Appliquée aux Ruminants, 75005, Paris, France.

<sup>2</sup> Department of Agricultural Research for Northern Sweden, Swedish University of Agricultural Sciences (SLU), Skogsmarksgränd, 90183 Umeå, Sweden.

## Abstract

**Background:** The red macroalgae *Asparagopsis taxiformis* is a potent natural supplement for reducing methane production from cattle. *A. taxiformis* contains several anti-methanogenic compounds including bromoform that inhibits directly methanogenesis. The positive and adverse effects of *A. taxiformis* on the rumen microbiota are dose-dependent and operate in a dynamic fashion. It is therefore key to characterize the dynamic response of the rumen microbial fermentation for identifying optimal conditions on the use of *A. taxiformis* as a dietary supplement for methane mitigation. Accordingly, the objective of this work was to model the effect of *A. taxiformis* supplementation on the rumen microbial fermentation under *in vitro* conditions. We adapted a published mathematical model of rumen microbial fermentation to account for *A. taxiformis* supplementation. We modelled the impact of *A. taxiformis* on the fermentation and methane production by two mechanisms, namely (i) direct inhibition of the growth rate of methanogens by bromoform and (ii) hydrogen control on sugars utilization and on the flux distribution towards volatile fatty acids production. We calibrated our model using a multi-experiment estimation approach that integrated experimental data with six macroalgae supplementation levels from a published *in vitro* study assessing the dose-response impact of *A. taxiformis* on rumen fermentation.

**Results:** our model captured satisfactorily the effect of *A. taxiformis* on the dynamic profile of rumen microbial fermentation for the six supplementation levels of *A. taxiformis* with an average determination coefficient of 0.88 and an average coefficient of variation of the root mean squared error of 15.2% for acetate, butyrate, propionate, ammonia and methane.

**Conclusions:** our results indicated the potential of our model as prediction tool for assessing the impact of additives such as seaweeds on the rumen microbial fermentation and methane production *in vitro*. Additional dynamic data on hydrogen and bromoform are required to validate our model structure and look for model structure improvements. We expect this model development can be useful to help the design of sustainable nutritional strategies promoting healthy rumen function and low environmental footprint.

**Keywords:** greenhouse gas mitigation, hydrogen control, methane inhibitors, methane mitigation, red seaweed, rumen fermentation, rumen microbiota, rumen model.

## 1 1. Background

2 Some macroalgae (seaweeds) have the potential to be used as natural supplement for  
3 reducing methane (CH<sub>4</sub>) production from cattle (Wang *et al.*, 2008; Dubois *et al.*, 2013; Maia  
4 *et al.*, 2016). This anti-methanogenic activity adds value to the nutritional and healthy  
5 promoting properties of macroalgae in livestock diets (Evans and Critchley, 2014; Makkar *et al.*,  
6 2016). The species of the red macroalgae *Asparagopsis* have proven a strong anti-  
7 methanogenic effect both *in vitro* (Machado *et al.*, 2014) and *in vivo* (Roque *et al.*, 2019). In  
8 particular, *Asparagopsis taxiformis* appears as the most potent species for methane mitigation  
9 with studies reporting a reduction in enteric methane up to 80% in sheep (Li *et al.*, 2016) and  
10 up to 80% and 98% in beef cattle (Kinley *et al.*, 2020; Roque *et al.*, 2020). The anti-  
11 methanogenic power of *A. taxiformis* results from the action of its multiple secondary  
12 metabolites with antimicrobial activities, being bromoform the most abundant anti-  
13 methanogenic compound (Machado *et al.*, 2016b). It should be said, however, that despite  
14 the promising anti-methanogenic capacity of bromoform, the feasibility of supplying  
15 bromoform-containing macroalgae requires a global assessment to insure safety of feeding  
16 and low environmental footprint from the algae processing, since bromoform can be toxic to  
17 the environment and can impair human health (Beauchemin *et al.*, 2020).

18 Bromoform is released from specialised gland cells of the macroalage (Paul *et al.*, 2006) in to  
19 the culture medium. The mode of action of the anti-methanogenic activity of bromoform is  
20 similar to that described for bromochloromethane (Denman *et al.*, 2007), following the  
21 mechanism suggested for halogenated hydrocarbons (Wood *et al.*, 1968; Czerkawski and  
22 Breckenridge, 1975). Accordingly, bromoform inhibits the cobamid dependent methyl-  
23 transfer reactions that lead to methane formation. In addition to the direct effect on the  
24 methanogenesis, the antimicrobial activity of *A. taxiformis* impacts the fermentation profile  
25 (*e.g.*, acetate:propionate ratio) and the structure of the rumen microbiota (*e.g.*, the relative  
26 abundance of methanogens) (Machado *et al.*, 2018; Roque *et al.*, 2019). Fermentation  
27 changes may have detrimental effects on animal health and productivity (Chalupa, 1977; Li *et al.*,  
28 2016). Detrimental effects might include deterioration of the ruminal mucosa and the  
29 transfer of bromoform to tissues, blood and milk. Previous studies have not detected  
30 bromoform in animal tissues (Li *et al.*, 2016; Kinley *et al.*, 2020; Roque *et al.*, 2020). The  
31 positive and adverse effects of *A. taxiformis* on the rumen microbiota are dose-dependent  
32 (Machado *et al.*, 2016a) and operate in a dynamic fashion. It is therefore key to characterize  
33 the dynamic response of the rumen microbial fermentation for identifying optimal conditions  
34 on the use of the *A. taxiformis* as a dietary supplement for methane mitigation. The  
35 development of dynamic mathematical models provides valuable tools for the assessment of  
36 feeding and mitigation strategies (Ellis *et al.*, 2012) including developments in the  
37 manipulation of the flows of hydrogen to control rumen fermentation (Ungerfeld, 2020).  
38 Progress on rumen modelling including a better representation of the rumen microbiota and  
39 the representation of additives on the fermentation is central for the deployment of predictive  
40 tools that can guide microbial manipulation strategies for sustainable livestock production  
41 (Huws *et al.*, 2018). Accordingly, the objective of this work was to model the effect of *A.*  
42 *taxiformis* supplementation on the dynamics of rumen microbial fermentation under *in vitro*  
43 conditions. We adapted a published rumen fermentation model (Muñoz-Tamayo *et al.*, 2016)  
44 to account for the impact of *A. taxiformis* on rumen fermentation and methane production  
45 evaluated *in vitro* at six supplementation levels (Chagas *et al.*, 2019).

## 46 2. Methods

### 47 2.1. Experimental data

48 Model calibration was performed using experimental data from an *in vitro* batch study  
49 assessing the dose-response impact of *A. taxiformis* on fermentation and methane production  
50 (Chagas *et al.*, 2019). In such a study, *A. taxiformis* with 6.84 mg/g DM bromoform  
51 concentration was supplemented at six treatment levels (0, 0.06, 0.13, 0.25, 0.5, and 1.0 % of  
52 diet organic matter; OM). All experimental treatments were composed of a control diet  
53 consisted of timothy grass (*Phleum pratense*), rolled barley (*Hordeum vulgare*), and rapeseed  
54 (*Brassica napus*) meal in a ratio of 545:363:92 g/kg diet dry matter (DM) presenting chemical  
55 composition as 944 g/kg OM, 160 g/kg crude protein (CP) and 387 g/kg neutral detergent fiber  
56 (NDF). Prior to each *in vitro* incubation, dried individual ingredients milled at 1 mm were  
57 weighted into serum bottles totalizing 1000 mg substrate on DM basis. The incubation was  
58 carried out with rumen inoculum from two lactating Swedish Red cows cannulated in the  
59 rumen, fed ad libitum on a diet of 600 g/kg grass silage and 400 g/kg concentrate on DM basis.  
60 Diet samples were incubated for 48 h in 60 ml of buffered rumen fluid (rumen fluid:buffer  
61 ratio of 1:4 by volume) as described by Chagas *et al.* (2019). The *in vitro* batch fermentation  
62 was run in a fully automated system that allows continuous recording of gas production  
63 (Ramin and Huhtanen, 2012).

64 Methane production, acetate, butyrate, propionate, and ammonia were measured  
65 throughout the incubation period. Methane was measured at 0, 2, 4, 8, 24, 36 and 48 h  
66 according to (Ramin and Huhtanen, 2012). Gas production was measured using a fully  
67 automated system (Gas Production Recorder, GPR-2, Version 1.0 2015, Wageningen UR), with  
68 readings made every 12 min and corrected to the normal air pressure (101.3 kPa). Methane  
69 concentration was determined with a Varian Star 3400 CX gas chromatograph (Varian  
70 Analytical Instruments, Walnut Creek, CA, USA) equipped with a thermal conductivity  
71 detector. The volatile fatty acids (VFAs) were measured at 0, 8, 24 and 48 h and determined  
72 using a Waters Alliance 2795 UPLC system as described by (Puhakka *et al.*, 2016). Ammonia  
73 was measured at 0 and 24h and analysed with a continuous flow analyzer (AutoAnalyzer 3 HR,  
74 SEAL Analytical Ltd., Southampton, UK) and according to the method provided by SEAL  
75 Analytical (Method no. G-102-93 multitest MT7). For model calibration, we only considered  
76 data until 24h, since microbial fermentation stopped around this time.

77

### 78 2.2. Mathematical modelling

79 We adapted the mathematical model of *in vitro* rumen fermentation developed by (Muñoz-  
80 Tamayo *et al.*, 2016) to account for the effect of *A. taxiformis* on the fermentation. This model  
81 represents the rumen microbiota by three microbial functional groups (sugar utilisers, amino  
82 acid utilisers and methanogens). Hexose monomers are represented by glucose and amino  
83 acids are represented by an average amino acid. The model is an aggregated representation  
84 of the anaerobic digestion process that comprises the hydrolysis of cell wall carbohydrates  
85 (NDF - Neutral Detergent Fiber), non-fiber carbohydrates (NSC - Non Structural  
86 Carbohydrates) and proteins, the fermentation of soluble monomers producing the VFAs  
87 acetate, butyrate, propionate, and the hydrogenotrophic methanogenesis. The original  
88 model was calibrated using *in vitro* experimental data from (Serment *et al.*, 2016). Figure 1

89 displays a schematic representation of the rumen fermentation model indicating the effect of  
 90 *A. taxiformis* on the fermentation. We assumed that microbial cells are formed by proteins  
 91 and non-fiber carbohydrates and that dead microbial cells are recycled as carbon sources in  
 92 the fermentation.  
 93

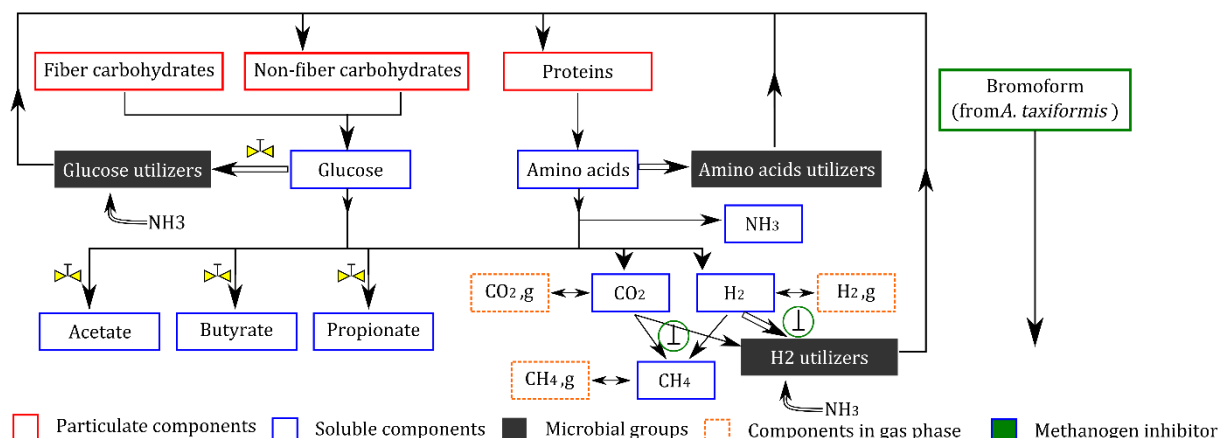

95 **Figure 1.** Representation of the rumen fermentation model (adapted from (Muñoz-Tamayo *et al.*, 2016)). Hydrolysis of carbohydrates (fiber and non-fiber) and proteins releases  
 96 respectively sugars and amino acids soluble monomers which are further utilized by the  
 97 microbiota. The utilization of substrate is directed to product formation (single arrows) and  
 98 microbial growth (double arrows). Each substrate is utilized by a single microbial functional  
 99 group. The bromoform contained in *A. taxiformis* produces a direct inhibition of the growth  
 100 rate of methanogens that results in a reduction of methane production and in an  
 101 accumulation of hydrogen. The symbol  $\textcircled{\perp}$  indicates the direct effect of the bromoform on the  
 102 methanogenesis. Hydrogen exerts control on sugars utilization and on the flux distribution  
 103 towards volatile fatty acids production. The symbol  $\text{⚡}$  indicates the hydrogen control effect  
 104 on the rumen fermentation.  
 105  
 106

107 The model is derived from mass balance equations of a closed system under the assumption  
 108 that the protocol of gas sampling does not affect substantially the dynamics of methane and  
 109 fermentation dynamics. Our model is described in compact way as follows

$$110 \quad \frac{d\xi}{dt} = \mathbf{S} \cdot \boldsymbol{\rho}(\xi, \mathbf{p}) - \mathbf{g}(\xi, \mathbf{p}) \quad (1)$$

111 Where  $\xi$  is the vector of state variables (metabolites),  $\boldsymbol{\rho}(\cdot)$  is a vector function with the kinetic  
 112 rates of hydrolysis and substrate (sugars, amino acids, hydrogen) utilization. Hydrolysis rates  
 113 are described by first-order kinetics. Substrate utilization rates are described by the Monod  
 114 kinetics.  $\mathbf{S}$  is the stoichiometry matrix containing the yield factors ( $Y_{i,j}$ ) of each metabolite ( $i$ )  
 115 for each reaction ( $j$ ),  $\mathbf{g}(\cdot)$  is a vector function with the equations representing transport  
 116 phenomena (liquid–gas transfer), and  $\mathbf{p}$  is the vector of the model parameters. The original  
 117 model has 18 state variables (compartments in Figure. 1) and was implemented in Matlab (the  
 118 code is accessible at <https://doi.org/10.5281/zenodo.4047640>). An implementation in R  
 119 software is also available (Kettle *et al.*, 2018). In the present work, we incorporated an  
 120 additional state variable to represent the dynamics of bromoform concentration. The original  
 121 model was extended to account for the impact of *A. taxiformis* on the rumen fermentation.  
 122 While the original model predicts the pH, we set the pH value to 6.6.  
 123

124 The impact of *A. taxiformis* on the fermentation and methane production was ascribed to two  
125 mechanisms, namely the (i) direct inhibition of the growth rate of methanogens by  
126 bromoform and (ii) hydrogen control on sugars utilization and on the flux distribution towards  
127 volatile fatty acids production. These aspects are detailed below.

128

129 For the methanogenesis, the reaction rate of hydrogen utilization  $\rho_{H_2}$  (mol/(L h)) is given by

130

131 
$$\rho_{H_2} = I_{br} \cdot I_{IN} \cdot k_{m,H_2} \frac{s_{H_2}}{K_{s,H_2} + s_{H_2}} x_{H_2} \quad (2)$$

132

133 where  $s_{H_2}$  (mol/L) is the hydrogen concentration in liquid phase,  $x_{H_2}$  (mol/L) is the  
134 concentration of hydrogen-utilizing microbes (methanogens),  $k_{m,H_2}$  (mol/(mol h)) is the  
135 maximum specific utilization rate constant of hydrogen and  $K_{s,H_2}$  (mol/L) is the Monod affinity  
136 constant of hydrogen utilization, and  $I_{IN}$  is a nitrogen limitation factor. The kinetic rate is  
137 inhibited by the anti-methanogenic compounds of *A. taxiformis*. The factor  $I_{br}$  represents this  
138 inhibition as function of the bromoform concentration. We used the following sigmoid  
139 function to describe  $I_{br}$

140

141 
$$I_{br} = 1 - \frac{1}{1 + \exp(-p_1 \cdot (s_{br} + p_2))} \quad (3)$$

142

143 where  $s_{br}$  is the bromoform concentration (g/L) and  $p_1, p_2$  are the parameters of the sigmoid  
144 function. We included in our model the dynamics of bromoform using a first-order kinetics to  
145 take into account that the inhibition of *A. taxiformis* declines on time as a result of the  
146 consumption of anti-methanogenic compounds (Kinley *et al.*, 2016). The dynamics of  $s_{br}$  is

147

148 
$$\frac{ds_{br}}{dt} = -k_{br} \cdot s_{br} \quad (4)$$

149

150 where  $k_{br}$  (1/h) is the kinetic rate constant of bromoform utilization.

151

152 With regard to sugars utilization, we assumed that the effect of *A. taxiformis* is ascribed to  
153 hydrogen control due to accumulation of hydrogen resulting from the methanogenesis  
154 inhibition. Hydrogen level influences the fermentation pattern (Janssen, 2010). We used the  
155 structure proposed by (Mosey, 1983) to account for hydrogen control on sugar utilization and  
156 flux distribution. However, we used different parametric functions to those proposed by  
157 (Mosey, 1983). The functions proposed by (Mosey, 1983) did not provide satisfactory results.

158

159 In our model, the kinetic rate of sugar utilization is described by

160

161 
$$\rho_{su} = I_{H_2} \cdot I_{IN} \cdot k_{m,su} \frac{s_{su}}{K_{s,su} + s_{su}} x_{su} \quad (5)$$

162 where  $s_{su}$  (mol/L) is the concentration of sugars,  $x_{su}$  (mol/L), is the concentration of sugar  
163 utilizers microbes, ( $k_{m,su}$  (mol/(mol h)) is the maximum specific utilization rate constant of  
164 sugars and  $K_{s,su}$  (mol/L) is the Monod affinity constant of sugars utilization. The factor  
165  $I_{H_2}$  describes the hydrogen inhibition:

166  
167  
168  
169  
170  
171  
172  
173  
174  
175  
176

$$I_{H_2} = 1 - \frac{1}{1 + \exp(-p_3 \cdot (p_{H_2} + p_4))} \quad (6)$$

with  $p_{H_2}$  the hydrogen partial pressure ( $p_{H_2}$ ).

In our model, the rumen fermentation is represented by the macroscopic reactions in Table 1.

**Table 1.** Macroscopic reactions used in our model to representing rumen fermentation. For the anabolic reactions of microbial formation, we assume that microbial biomass has the molecular formula  $C_5H_7O_2N$ .

| <i>Sugars (glucose) utilization</i>                                                                                                                                                                                                                                                                        |                  |
|------------------------------------------------------------------------------------------------------------------------------------------------------------------------------------------------------------------------------------------------------------------------------------------------------------|------------------|
| $C_6H_{12}O_6 + 2H_2O \rightarrow 2CH_3COOH + 2CO_2 + 4H_2$                                                                                                                                                                                                                                                | R <sub>1</sub>   |
| $3C_6H_{12}O_6 \rightarrow 2CH_3COOH + 4CH_3CH_2COOH + 2CO_2 + 2H_2O$                                                                                                                                                                                                                                      | R <sub>2</sub>   |
| $C_6H_{12}O_6 \rightarrow CH_3CH_2CH_2COOH + 2CO_2 + 2H_2$                                                                                                                                                                                                                                                 | R <sub>3</sub>   |
| $5C_6H_{12}O_6 + 6NH_3 \rightarrow 6C_5H_7O_2N + 18H_2O$                                                                                                                                                                                                                                                   | R <sub>4</sub>   |
| <i>Amino acid utilization</i>                                                                                                                                                                                                                                                                              |                  |
| $C_5H_{9.8}O_{2.7}N_2 \rightarrow Y_{IN,aa} NH_3 + (1 - Y_{aa}) \cdot \sigma_{ac,aa} CH_3COOH + (1 - Y_{aa}) \cdot \sigma_{pr,aa} CH_3CH_2COOH + (1 - Y_{aa}) \cdot \sigma_{bu,aa} CH_3CH_2CH_2COOH + (1 - Y_{aa}) \cdot \sigma_{IC,aa} CO_2 + (1 - Y_{aa}) \cdot \sigma_{H_2,aa} H_2 + Y_{aa} C_5H_7O_2N$ | R <sub>5</sub> * |
| <i>Hydrogen utilization</i>                                                                                                                                                                                                                                                                                |                  |
| $4H_2 + 2CO_2 \rightarrow CH_4 + 2H_2O$                                                                                                                                                                                                                                                                    | R <sub>6</sub>   |
| $10H_2 + 5CO_2 + NH_3 \rightarrow C_5H_7O_2N + 8H_2O$                                                                                                                                                                                                                                                      | R <sub>7</sub>   |

\*R<sub>5</sub> is an overall reaction resulting from weighing the fermentation reactions of individual amino acids.

177  
178  
179  
180  
181  
182  
183  
184  
185  
186  
187  
188  
189  
190  
191  
192  
193  
194  
195  
196  
197  
198

Table 1 shows that VFA production from glucose utilization occurs *via* reactions R<sub>1</sub>-R<sub>3</sub>. The pattern of the fermentation is determined by the flux distribution of glucose utilization through these three reactions. We denote  $\lambda_k$  as the molar fraction of the sugars utilized *via* reaction  $k$ . It follows that  $\lambda_1 + \lambda_2 + \lambda_3 = 1$ .

The fermentation pattern (represented in our model by the flux distribution parameters  $\lambda_k$ ) is controlled by thermodynamic conditions and by electron-mediating cofactors such as nicotinamide adenine dinucleotide (NAD) that drive anaerobic metabolism via the transfer of electrons in metabolic redox reactions (Mosey, 1983; Hoelzle *et al.*, 2014; van Lingen *et al.*, 2019). In our model, the regulation exerted by the NADH/NAD<sup>+</sup> couple on the flux distribution is incorporated *via* regulation functions that are dependent on the hydrogen partial pressure ( $p_{H_2}$ ). This hybrid approach resulted by assuming a linearity between the couple NADH/NAD<sup>+</sup> and the  $p_{H_2}$  following the work of (Mosey, 1983; Costello *et al.*, 1991). As discussed by (van Lingen *et al.*, 2019), the production of acetate *via* the reaction R<sub>1</sub> is favoured at low NADH/NAD<sup>+</sup> while the production of propionate *via* the reaction R<sub>2</sub> is favoured at high NADH/NAD<sup>+</sup>. Accordingly, we represented the flux distribution parameters by the following sigmoid functions:

$$\lambda_1 = 1 - \frac{1}{1 + \exp(-p_5 \cdot (p_{H_2} + p_6))} \quad (7)$$

$$\lambda_2 = \frac{p_7}{1 + \exp(-p_8 \cdot (p_{H_2} + p_9))} \quad (8)$$

199 Our model then predicts that high levels of supplementation of *A. taxiformis* will result in high  
200 hydrogen levels that will favour propionate production ( $R_2$ ) over acetate production ( $R_1$ ). By  
201 this parameterization of the flux distribution parameters, our model accounts for the  
202 concomitant reduction of the acetate:propionate ratio that is observed when methane  
203 production is reduced.

204

### 205 **2.3. Parameter estimation**

206 We used the maximum likelihood estimator that minimizes the following objective function

207

$$208 \quad J(\mathbf{p}) = \sum_{k=1}^{n_y} \frac{n_{t,k}}{2} \ln \left[ \sum_{i=1}^{n_{t,k}} [y_k(t_{i_k}) - y_{m_k}(t_{i_k}, \mathbf{p})]^2 \right] \quad (9)$$

209

210 Where  $\mathbf{p}$  is the vector of parameters to be estimated,  $n_y$  is the number of measured variables,  
211  $n_{t,k}$  is the number of observation times of the variable  $k$ ,  $t_{i_k}$  is the  $i$ th measurement time for  
212 the variable  $y_k$ , and  $y_{m_k}$  is the value predicted by the model. The measured variables are the  
213 concentrations of acetate, butyrate, propionate,  $\text{NH}_3$ , and the moles of methane produced.

214 We used the IDEAS Matlab® (Muñoz-Tamayo *et al.*, 2009) (freely available at  
215 <http://genome.jouy.inra.fr/logiciels/IDEAS>) to generate the function files for solving the  
216 optimization problem locally. Then, we used the generated files by IDEAS to look for global  
217 optimal solutions using the Matlab optimization toolbox MEIGO (Egea *et al.*, 2014) that  
218 implements the enhanced scatter search method developed by (Egea *et al.*, 2010) for global  
219 optimization.

220

221 We reduced substantially the number of parameters to be estimated by setting most of the  
222 model parameters to the values reported in the original model implementation and using the  
223 information obtained from the *in vitro* study (Chagas *et al.*, 2019). For example, the hydrolysis  
224 rate constant for NDF was obtained from (Chagas *et al.*, 2019) whereas the hydrolysis rate  
225 constants of NSC ( $k_{\text{hydr,nsc}}$ ) and proteins ( $k_{\text{hydr,pro}}$ ) were included in the parameter  
226 estimation problem. The kinetic rate constant for hydrogen utilization  $k_{\text{m,H}_2}$  was set 16  
227 mol/(mol h) using an average value of the values we obtained for the predominant archaea  
228 *Methanobrevibacter ruminantium* and *Methanobrevibacter smithii* (Muñoz-Tamayo *et al.*,  
229 2019) using a microbial yield factor of 0.006 mol biomass/mol  $\text{H}_2$  (Pavlostathis *et al.*, 1990).  
230 With this strategy, we penalize the goodness-of-fit of the model. But, on the other hand, we  
231 reduce practical identifiability problems typically found when calibrating biological kinetic-  
232 based models (Vanrolleghem *et al.*, 1995). The parameter vector for the estimation is then  $\mathbf{p}$ :  
233  $\{k_{\text{hydr,nsc}}, k_{\text{hydr,pro}}, k_{\text{br}}, p_1, p_2, \dots, p_9\}$ . The optimization was set in a multi-experiment fitting  
234 context that integrates the data of all treatments. To evaluate the model performance, we  
235 computed the determination coefficient ( $R^2$ ), the Lin's concordance correlation coefficient  
236 (CCC) (Lin, 1989), the Root mean squared error (RMSE) and the coefficient of variation of the  
237 RMSE ( $\text{CV}_{\text{RMSE}}$ ). We also performed residual analysis for bias assessment according to (St-  
238 Pierre, 2003).

## 239 **3. Results**

### 240 **3.1. Dynamic prediction of rumen fermentation**

241 The extended model developed in the present work to account for the impact of *A. taxiformis*  
242 on the rumen fermentation is freely available at <https://doi.org/10.5281/zenodo.4090332>

243 with all the detailed information of the model and the experimental data used for model  
244 calibration. An open source version in the Scilab software (<https://www.scilab.org/>) was made  
245 available to facilitate reproducibility since Scilab files can be opened with a text editor.  
246 Figure 2 shows the dynamic data of fermentation variables for the levels of *A. taxiformis* at  
247 0.06% and 0.25% compared against the model predicted variables. Figure 3 displays the  
248 comparison of all observations against model predictions. Figure 4 shows the residuals for all  
249 variables against centred predicted values.  
250 To evaluate the performance of our model and its validation, external independent data is  
251 required. Due to data limitation, we did not perform such a validation. To provide indicators  
252 of our model, we calculated standard statistical indicators of model performance which are  
253 shown in Table 2. These statistic indicators are biased and thus should be looked with caution  
254 since they are calculated using the calibration data. Nevertheless, they provide an indication  
255 of the adequacy of the model structure to represent the fermentation dynamics. For methane,  
256 butyrate and NH<sub>3</sub> the mean and linear biases were not significant at the 5% significance level.  
257 Acetate and propionate exhibited significant linear bias. The liquid compounds have an  
258 average coefficient of variation of the RMSE (CV(RMSE)) of 11.25%. Methane had the higher  
259 CV(RMSE) (31%). The concordance correlation coefficients were higher than 0.93. Propionate  
260 had the lowest determination coefficient ( $R^2=0.82$ ) while methane and the other compounds  
261 had a  $R^2$  close to 0.9.  
262  
263

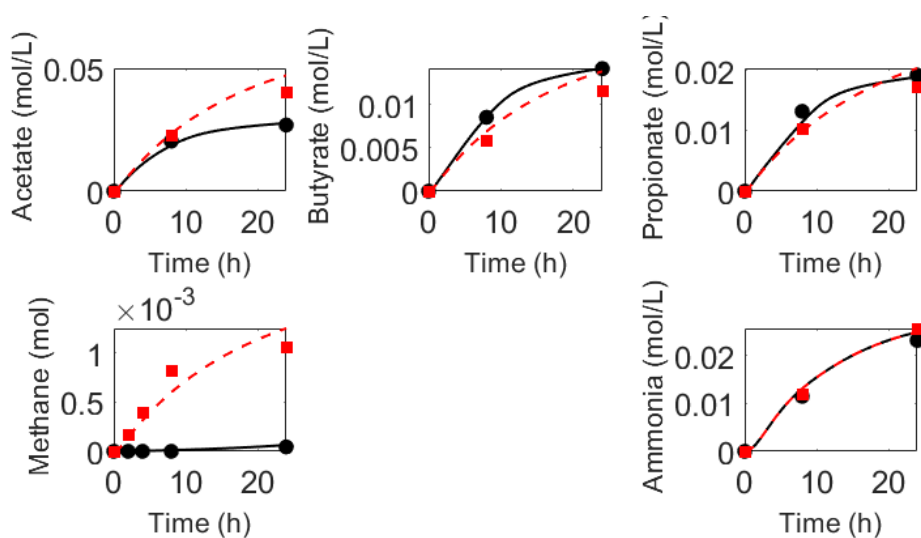

264  
265 **Figure 2.** Example of model fitting. Experimental data of fermentation variables for the levels  
266 of *A. taxiformis* at 0.25% (●) and 0.06% (■) are compared against the model predicted  
267 responses in solid black lines (for 0.25% level) and in dashed red lines (for the 0.06% level).  
268



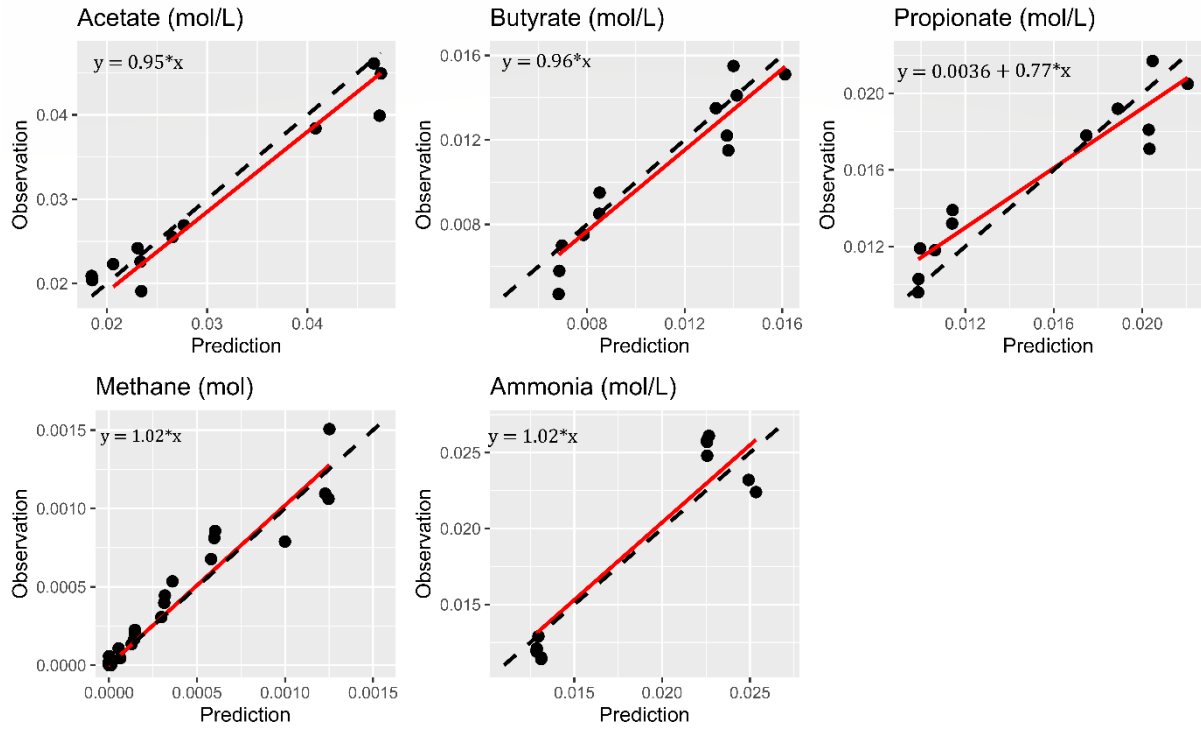

269  
270 **Figure 3.** Summary of the model performance calibration integrating data of all treatments.  
271 Experimental data (●) are plotted against the model predicted variables. Solid lines are the  
272 linear fitted curve. Dashed lines are the isoclines.

273  
274  
275

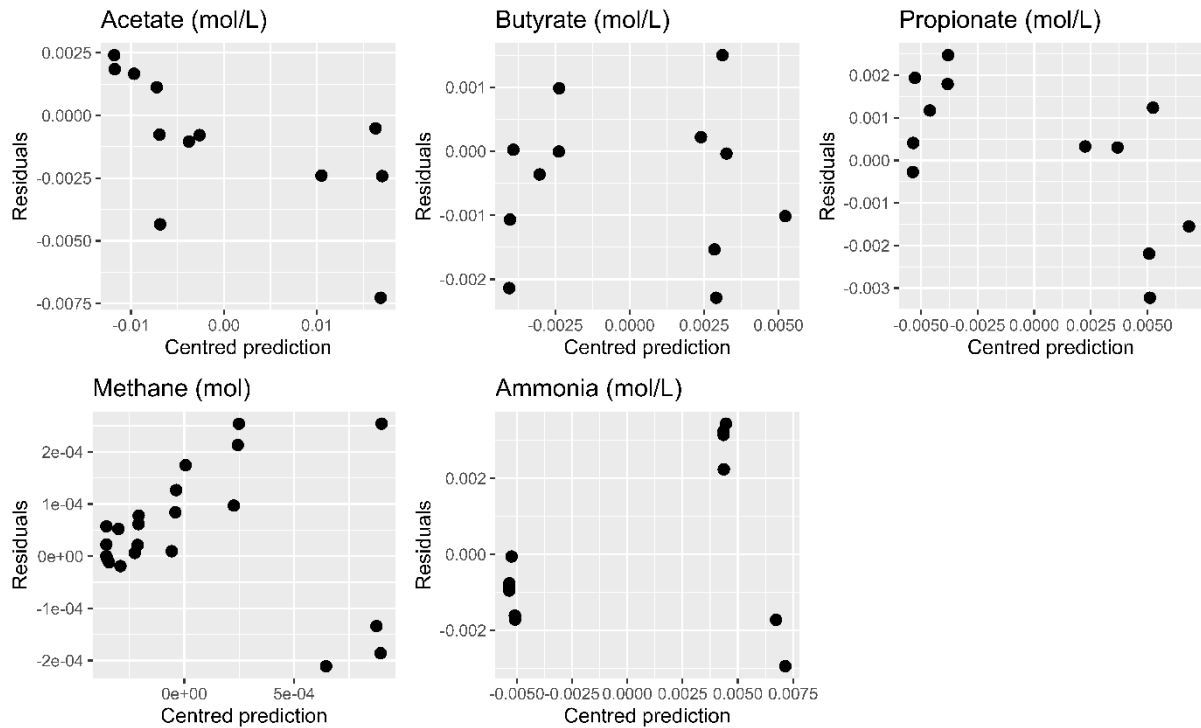

276  
277 **Figure 4.** Residuals values of observed variables against centred predicted variables ( $n_{CH_4}$   
278 =24,  $n_{NH_3} = n_{ac} = n_{bu} = n_{pr} = 12$ ).

279  
280 **Table 2.** Statistical indicators of model performance.

|                                     | Acetate | Butyrate | Propionate | Methane               | NH <sub>3</sub> |
|-------------------------------------|---------|----------|------------|-----------------------|-----------------|
| R <sup>2</sup>                      | 0.91    | 0.88     | 0.82       | 0.92                  | 0.89            |
| RMSE <sup>a</sup>                   | 0.0029  | 0.0012   | 0.0017     | 1.21x10 <sup>-4</sup> | 0.002           |
| 100×CV <sub>RMSE</sub> <sup>b</sup> | 10      | 12       | 11         | 31                    | 12              |
| CCC <sup>c</sup>                    | 0.96    | 0.94     | 0.93       | 0.96                  | 0.93            |

  

| Residual analysis                                                      |                      |                       |                      |                      |                      |
|------------------------------------------------------------------------|----------------------|-----------------------|----------------------|----------------------|----------------------|
| $residual = \alpha + \beta \cdot (predicted - mean\ predicted\ value)$ |                      |                       |                      |                      |                      |
|                                                                        | Acetate              | Butyrate              | Propionate           | Methane              | NH <sub>3</sub>      |
| $\alpha$ (p-value)                                                     | -0.0010<br>(p= 0.14) | -0.00047<br>(p= 0.21) | 0.00019<br>(p= 0.63) | 4.0e-05<br>(p= 0.12) | 0.00012<br>(p= 0.86) |
| $\beta$ (p-value)                                                      | -0.15<br>(p= 0.024)  | 0.0028<br>(p= 0.98)   | -0.22<br>(p= 0.024)  | -0.031<br>(p= 0.60)  | 0.15<br>(p= 0.23)    |

281 <sup>a</sup> Root mean squared error (RMSE).  
 282 <sup>b</sup> Coefficient of variation of the RMSE (CV(RMSE)).  
 283 <sup>c</sup> Concordance correlation coefficient (CCC)

### 3.2. Prediction of the factors representing the impact of *A. taxiformis* on rumen fermentation

285  
 286  
 287  
 288 Figure 5 plots the factors that represent the effect of *A. taxiformis* on rumen fermentation.  
 289 Direct inhibition of the methanogenesis due to the anti-methanogenic action of bromoform  
 290 is represented by the factor  $I_{br}$ . Methanogenesis inhibition results in hydrogen accumulation  
 291 impacting the flux distribution of sugars utilization.

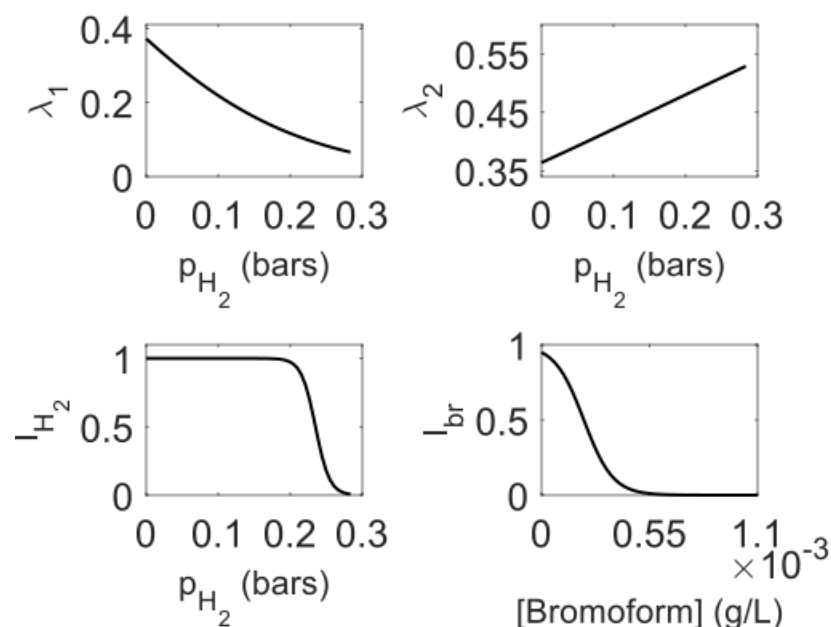

293  
 294 **Figure 5.** In our model, the effect of *A. taxiformis* on rumen fermentation is represented by a  
 295 direct inhibitory effect of bromoform ( $I_{br}$ ) on the methanogens growth rate. Methanogenesis  
 296 inhibition results in hydrogen accumulation. Hydrogen control impacts sugar utilization by  
 297 inhibiting the rate of sugar utilization (factor  $I_{H_2}$ ) and by regulating the flux distribution  
 298 parameters ( $\lambda_1, \lambda_2$ ) towards VFA production.

299 Figure 6 displays the simulated dynamics of hydrogen in the headspace for all the  
300 supplementation levels of *A. taxiformis*. For supplementation levels higher than 0.25%, the  
301 methanogenesis inhibition resulted in a substantial hydrogen accumulation.  
302

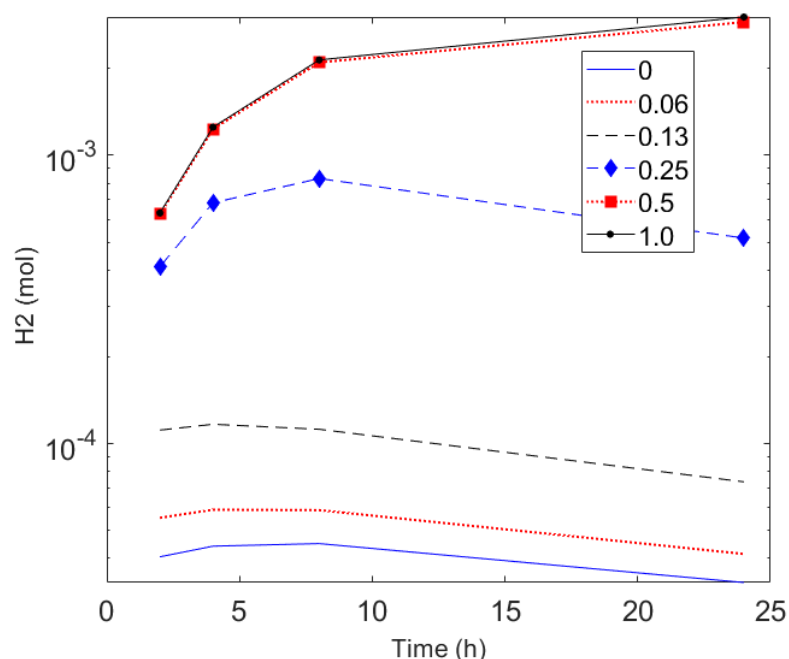

303 **Figure 6.** Predicted dynamics of hydrogen in the headspace for levels of *A. taxiformis*. Increase  
304 of the dose of *A. taxiformis* results in an increase of hydrogen in the incubation system.  
305  
306

## 307 4. Discussion

308 The goal of this work was to model the impact of *A. taxiformis* supplementation on the rumen  
309 microbial fermentation and methane production under *in vitro* conditions using experimental  
310 data from (Chagas *et al.*, 2019). Overall, our model was able to capture the dynamics of VFA,  
311 ammonia and methane production for different levels of *A. taxiformis* indicating the potential  
312 of the model structure towards the development of predictive models for assessing methane  
313 mitigation strategies in ruminants. With the exception of propionate, the slope of observed vs  
314 predicted variables is very close to one. Model limitations will be discussed further. We  
315 modelled the effect of *A. taxiformis* on rumen fermentation by two mechanisms. The first  
316 mechanism is associated to the direct inhibition of the methanogens growth rate by the anti-  
317 methanogenic compounds of *A. taxiformis* documented in different studies (Kinley *et al.*,  
318 2016; Machado *et al.*, 2016a; Roque *et al.*, 2019). In our model, we ascribed the inhibitory  
319 effect of *A. taxiformis* only to the concentration of bromoform. The first-order kinetic rate for  
320 bromoform consumption and the inhibition factor ( $I_{br}$ ) (Fig. 5) allowed our model to account  
321 for the observed dynamic decline in methanogenesis inhibition (Kinley *et al.*, 2016). It should  
322 be noted that although bromoform is the most abundant anti-methanogenic compound in *A.*  
323 *taxiformis*, the anti-methanogenic capacity of *A. taxiformis* is the result of the synergetic  
324 action of all halogenated products present in the macroalgae (Machado *et al.*, 2016b) .  
325 Accordingly, it will be useful to include further in our model other secondary compounds such  
326 as dibromochloromethane. To enhance our model, it will be central to perform novel  
327 experiments to characterize the dynamics of anti-methanogenic compounds. This aspect is of

328 great relevance to allow the model to be adapted to different applications of seaweed  
329 supplementation since it is known that the composition of halogenic compounds can vary with  
330 respect to the season, harvesting and drying methods.

331 The second mechanism that accounts for the impact of *A. taxiformis* on the fermentation is  
332 hydrogen control, which it is discussed below.

#### 333 **4.1. Hydrogen control**

334 The anti-methanogenic capacity of *A. taxiformis* leads to hydrogen accumulation (Kinley *et al.*,  
335 2020; Roque *et al.*, 2020) as predicted by our model in Fig. 6. The level of hydrogen increases  
336 as the dose of *A. taxiformis* increases. The predicted values of hydrogen levels in the  
337 headspace for low doses of *A. taxiformis* showing in Figure 6 are in agreement with *in vitro*  
338 reported values (Serment *et al.*, 2016). The level of hydrogen can impact electron-mediating  
339 cofactors such as nicotinamide adenine dinucleotide (NAD) which are important drivers of  
340 anaerobic metabolism *via* the transfer of electrons in metabolic redox reactions (Hoelzle *et*  
341 *al.*, 2014). van Lingen *et al.*, 2019 extended the rumen model developed by (Dijkstra *et al.*,  
342 1992) to incorporate the regulation of NADH/NAD<sup>+</sup> on the fermentation. In our model, the  
343 regulation of NADH/NAD<sup>+</sup> was incorporated *via* the control of hydrogen partial pressure  
344 assuming a linearity between the couple NADH/NAD<sup>+</sup> and the  $p_{H_2}$  and following the model  
345 structure proposed by (Mosey, 1983) with a different parameterisation for the functions  
346 describing the effect of  $p_{H_2}$  on the rate of glucose utilization and on the flux distribution. The  
347 linearity assumption between NADH/NAD<sup>+</sup> and the  $p_{H_2}$  might not be fulfilled for all values of  
348  $p_{H_2}$  (De Kok *et al.*, 2013).

349

350 In the experimental conditions used in the experiment here analysed (Chagas *et al.*, 2019) and  
351 under rumen physiological conditions, the linearity between NADH/NAD<sup>+</sup> might be valid.

352 With regard to the hydrogen control on glucose utilization, our model predicts that the  
353 inhibition is effective at  $p_{H_2}$  higher than 0.2 bar (factor  $I_{H_2}$  in Fig. 5). In our model, the  
354 incorporation of the inhibitory effect of hydrogen was motivated to account for the decrease  
355 of the total production of VFA at high levels of supplementation of *A. taxiformis* observed by  
356 (Chagas *et al.*, 2019). Such a decrease of VFA production is dose-dependent as observed *in*  
357 *vitro* studies (Kinley *et al.*, 2016; Machado *et al.*, 2016a). *In vivo*, while insignificant changes in  
358 total VFA concentration between a control diet and diets with *A. taxiformis* supplementation  
359 were observed in Brangus steers (Kinley *et al.*, 2020), inclusions of *A. taxiformis* resulted in a  
360 decrease in total VFA ruminal concentration in sheep compared with control diet (Li *et al.*,  
361 2016). Accordingly, additional studies with simultaneous measurements of VFA and hydrogen  
362 are needed to validate the relevance of the inhibitory term  $I_{H_2}$  of our model both under *in*  
363 *vitro* and *in vivo* conditions.

364 In addition to the impact of *A. taxiformis* supplementation on methane reduction, it is  
365 important to look at the effects on animal productivity. *A. taxiformis* impacts the production  
366 of VFAs, which are energetic sources for the animal. Accordingly, changes in VFA production  
367 might result in changes on productivity and feed efficiency. Optimal feeding strategies should  
368 thus be designed to attain a trade-off between low methane emissions and high productivity  
369 and animal health. Studies showing the effect of *A. taxiformis* supplementation on live weight  
370 (Li *et al.*, 2016), average daily weight gain and feed conversion efficiency (Kinley *et al.*, 2020;  
371 Roque *et al.*, 2020) are still few to provide a large data base for concluding on the impact of  
372 *A. taxiformis* on animal productivity and feed efficiency. However, the studies of (Kinley *et al.*,  
373 2020; Roque *et al.*, 2020) suggest that feed conversion efficiency tend to increase concomitant  
374 with the reduction of methane production induced by an adequate supplementation of *A.*  
375 *taxiformis*, supporting the theory of redirection of energy otherwise lost as methane (Kinley  
376 *et al.*, 2020). An opportunity to enhance the action of *A. taxiformis* might be the  
377 implementation of a feeding strategy integrating macroalgae supplementation with an  
378 adequate additive allowing to redirect metabolic hydrogen towards nutritional fermentation  
379 products beneficial to the animal. Such a strategy will fulfil the objectives of reducing methane  
380 emissions while increasing animal productivity (Ungerfeld, 2020).

381 With regard to the fermentation pattern, when the hydrogen level increases the hydrogen  
382 control operates by increasing the flux of carbon towards propionate ( $\lambda_2$ ) while the flux  
383 towards the reaction that produces only acetate ( $\lambda_1$ ) decreases (Fig. 5). Incorporating  
384 hydrogen control on the fermentation pattern in our model enabled us to predict the decrease  
385 of the acetate to propionate ratio observed at levels of *A. taxiformis* supplementation leading  
386 to substantial methane reduction both *in vitro* (Machado *et al.*, 2016a; Chagas *et al.*, 2019)  
387 and *in vivo* (Kinley *et al.*, 2020). Our model is also consistent with *in vitro* (Kinley *et al.*, 2016;  
388 Machado *et al.*, 2016a) and *in vivo* (Stefenoni *et al.*, 2021) studies showing the increase of  
389 butyrate level when the inclusion of *A. taxiformis* increases.

## 390 **4.2. Model limitations and perspectives**

391 In our model, the quantification of the impact of *A. taxiformis* was ascribed by the action of  
392 bromoform on the methanogens growth rate and by the action of  $p_{H_2}$  on the fermentation  
393 pattern. However, in the experimental study (Chagas *et al.*, 2019), nor bromoform nor  
394  $p_{H_2}$  were measured. From our bibliography search, we did not find studies reporting dynamic  
395 measurements of bromoform. Although we did not perform identifiability analysis, we might  
396 expect that the lack of bromoform and hydrogen data in our work might result in structural  
397 identifiability (Muñoz-Tamayo *et al.*, 2018) and model distinguishability problems (Walter and  
398 Pronzato, 1996). We will then require external data to validate our model. Experiments to be  
399 done within the MASTER project (<https://www.master-h2020.eu/contact.html>) will fill this  
400 gap and provide data for challenging and improving our model.

401 Our model aligns with the efforts of enhancing the dynamic prediction of ruminal metabolism  
402 *via* the incorporation of thermodynamics and regulation factors (Offner and Sauvant, 2006;  
403 Ghimire *et al.*, 2014; van Lingen *et al.*, 2019). While our work focused only on hydrogen control  
404 on sugars metabolism, future work is needed to incorporate the impact of *A. taxiformis*  
405 supplementation on amino acids fermentation. The study of (Chagas *et al.*, 2019) showed a  
406 decrease of branched-chain volatile fatty acids (BCVFA ) with increased supplementation of *A.*  
407 *taxiformis*. Such a decrease of BCVFA might have a negative influence on microbial activity.

408 We modelled the regulation of sugars metabolism by hydrogen control following a grey-box  
409 modelling approach where the regulation factors were assigned to sigmoid functions without  
410 an explicit mechanistic interpretation. However, to enhance the understanding of rumen  
411 fermentation, it will be useful to pursue an approach incorporating the role of internal  
412 electron mediating cofactors on the direction of electrons towards hydrogen or VFA (Hoelzle  
413 *et al.*, 2014; Ungerfeld, 2020). Recent progress in this area (van Lingen *et al.*, 2019) opens a  
414 direction for improving the prediction of rumen models.

415 The ultimate goal of this work is to pursue a model extension to account for *in vivo* conditions.  
416 In this endeavour, experimental data in semi-continuous devices such as the Rusitec (Roque  
417 *et al.*, 2019a) will be instrumental for model improvement. *In vivo*, in addition to the impact  
418 on fermentation, *A. taxiformis* can induce changes in rumen mucosa (Li *et al.*, 2016). These  
419 mucosa changes might translate in changes on the rate of absorption of ruminal VFA. This  
420 effect on the rate of VFA absorption should be quantified and incorporated into an extended  
421 model. In our model, the pH was set constant. However, pH exhibits a dynamic behaviour that  
422 can impact the activity of the rumen microbiota. The impact of the pH on the rumen microbial  
423 groups should be then considered in a future version, integrating the mechanistic calculation  
424 of pH elaborated in our previous model (Muñoz-Tamayo *et al.*, 2016).

425 Finally, although our model developments focused on the impact of *A. taxiformis* on rumen  
426 fermentation and methane production, we think our model structure has the potential to be  
427 applied to other additives such as 3-nitrooxypropanol (Hristov *et al.*, 2015; Duin *et al.*, 2016)  
428 whose action is specifically directed to inhibit methanogenic archaea, as the halogenated  
429 compounds of *A. taxiformis*. We expect these model developments can be useful to help the  
430 design of sustainable nutritional strategies promoting healthy rumen function and low  
431 environmental footprint

432

## 433 **5. Conclusions**

434 We have developed a rumen fermentation model that accounts for the impact of *A. taxiformis*  
435 supply on *in vitro* rumen fermentation and methane production. Our model was effective in  
436 representing the dynamics of VFA, ammonia and methane for six supplementation levels of  
437 *A. taxiformis*, providing a promising prediction tool for assessing the impact of additives such  
438 as seaweeds on rumen microbial fermentation and methane production *in vitro*.

## 439 **6. Declarations**

### 440 **Ethics approval and consent to participate:**

441 Not applicable

442 **Consent for publication:** Not applicable

### 443 **Availability of data and material**

444 The datasets and codes used in this study are available at  
445 <https://doi.org/10.5281/zenodo.4090332>

### 446 **Funding**

447 Authors acknowledge funding from the RumenPredict project funded by the Horizon2020  
448 Research & Innovation Programme under grant agreement No 696356. Rafael Muñoz-Tamayo  
449 acknowledges funding from the MASTER project, an Innovation Action funded by the  
450 European Union's Horizon 2020 research and innovation programme under grant agreement  
451 No 818368.  
452

### 453 **Acknowledgements**

454 Authors thank Henk van Lingen (University of California, Davis, USA), Alberto Atzori (University  
455 of Sassari, Italy) and two anonymous reviewers appointed by Luis Tedeschi (Texas A&M  
456 University, USA) for the evaluation of this manuscript by PCI Animal Science  
457 (<https://animsci.peercommunityin.org/>). Their reviews have greatly improved this paper.

### 458 **Authors' contributions**

459 JCC, MH and SJC produced the experimental data of the study. RMT developed the  
460 mathematical model and drafted the article. All authors contributed to the analysis and  
461 interpretation of the results. All authors read and approved the final manuscript.

### 462 **Competing interests**

463 The authors declare that they have no competing interests.

## 464 **7. References**

- 465 Beauchemin, K.A., Ungerfeld, E.M., Eckard, R.J., and Wang, M. (2020) Review: Fifty years of  
466 research on rumen methanogenesis: Lessons learned and future challenges for  
467 mitigation. *Animal* **14**(S1): S2–S16.
- 468 Chagas, J.C., Ramin, M., and Krizsan, S.J. (2019) In vitro evaluation of different dietary  
469 methane mitigation strategies. *Animals* **9**: 1120.
- 470 Chalupa, W. (1977) Manipulating Rumen Fermentation. *J Anim Sci* **46**: 585–599.
- 471 Costello, D.J., Greenfield, P.F., and Lee, P.L. (1991) Dynamic Modeling of a Single-Stage High-  
472 Rate Anaerobic Reactor .1. Model Derivation. *Water Res* **25**: 847–858.
- 473 Czerkawski, J.W. and Breckenridge, G. (1975) New inhibitors of methane production by  
474 rumen micro-organisms. Development and testing of inhibitors in vitro. *Br J Nutr* **34**:  
475 429–446.
- 476 Denman, S.E., Tomkins, N.W., and McSweeney, C.S. (2007) Quantitation and diversity  
477 analysis of ruminal methanogenic populations in response to the antimethanogenic  
478 compound bromochloromethane. *FEMS Microbiol Ecol* **62**: 313–322.
- 479 Dijkstra, J., Neal, H.D., Beever, D.E., and France, J. (1992) Simulation of nutrient digestion,  
480 absorption and outflow in the rumen: model description. *J Nutr* **122**: 2239–2256.
- 481 Dubois, B., Tomkins, N.W., D. Kinley, R., Bai, M., Seymour, S., A. Paul, N., and Nys, R. de  
482 (2013) Effect of Tropical Algae as Additives on Rumen *in Vitro* Gas Production and  
483 Fermentation Characteristics. *Am J Plant Sci* **4**: 34–43.
- 484 Duin, E.C., Wagner, T., Shima, S., Prakash, D., Cronin, B., Yáñez-Ruiz, D.R., et al. (2016) Mode  
485 of action uncovered for the specific reduction of methane emissions from ruminants by  
486 the small molecule 3-nitrooxypropanol. *Proc Natl Acad Sci U S A* **113**: 6172–6177.
- 487 Egea, J.A., Henriques, D., Cokelaer, T., Villaverde, A.F., MacNamara, A., Danciu, D.P., et al.  
488 (2014) MEIGO: An open-source software suite based on metaheuristics for global  
489 optimization in systems biology and bioinformatics. *BMC Bioinformatics* **15**: 136.
- 490 Egea, J.A., Martí, R., and Banga, J.R. (2010) An evolutionary method for complex-process  
491 optimization. *Comput Oper Res* **37**: 315–324.
- 492 Ellis, J.L., Dijkstra, J., France, J., Parsons, A.J., Edwards, G.R., Rasmussen, S., et al. (2012)  
493 Effect of high-sugar grasses on methane emissions simulated using a dynamic model. *J*  
494 *Dairy Sci* **95**: 272–285.
- 495 Evans, F.D. and Critchley, A.T. (2014) Seaweeds for animal production use. *J Appl Phycol* **26**:  
496 891–899.
- 497 Ghimire, S., Gregorini, P., and Hanigan, M.D. (2014) Evaluation of predictions of volatile fatty



- 498 acid production rates by the Molly cow model. *J Dairy Sci* **97**: 354–362.
- 499 Hoelzle, R.D., Viridis, B., and Batstone, D.J. (2014) Regulation mechanisms in mixed and pure  
500 culture microbial fermentation. *Biotechnol Bioeng* **111**: 2139–2154.
- 501 Hristov, A.N., Oh, J., Giallongo, F., Frederick, T.W., Harper, M.T., Weeks, H.L., et al. (2015) An  
502 inhibitor persistently decreased enteric methane emission from dairy cows with no  
503 negative effect on milk production. *Proc Natl Acad Sci U S A* **112**: 10663–10668.
- 504 Huws, S.A., Creevey, C.J., Oyama, L.B., Mizrahi, I., Denman, S.E., Popova, M., et al. (2018)  
505 Addressing global ruminant agricultural challenges through understanding the rumen  
506 microbiome: past, present, and future. *Front Microbiol* **9**: 2161.
- 507 Janssen, P.H. (2010) Influence of hydrogen on rumen methane formation and fermentation  
508 balances through microbial growth kinetics and fermentation thermodynamics. *Anim*  
509 *Feed Sci Technol* **160**: 1–22.
- 510 Kettle, H., Holtrop, G., Louis, P., and Flint, H.J. (2018) microPop: Modelling microbial  
511 populations and communities in R. *Methods Ecol Evol* **9**: 399–409.
- 512 Kinley, R.D., Martinez-Fernandez, G., Matthews, M.K., de Nys, R., Magnusson, M., and  
513 Tomkins, N.W. (2020) Mitigating the carbon footprint and improving productivity of  
514 ruminant livestock agriculture using a red seaweed. *J Clean Prod* **259**: 120836.
- 515 Kinley, R.D., De Nys, R., Vucko, M.J., MacHado, L., and Tomkins, N.W. (2016) The red  
516 macroalgae *Asparagopsis taxiformis* is a potent natural antimethanogenic that reduces  
517 methane production during in vitro fermentation with rumen fluid. *Anim Prod Sci* **56**:  
518 282–289.
- 519 Li, X., Norman, H.C., Kinley, R.D., Laurence, M., Wilmot, M., Bender, H., et al. (2016)  
520 *Asparagopsis taxiformis* decreases enteric methane production from sheep. *Anim Prod*  
521 *Sci* **58**: 681–688.
- 522 Lin, L.I. (1989) A concordance correlation-coefficient to evaluate reproducibility. *Biometrics*  
523 **45**: 255–268.
- 524 van Lingen, H.J., Fadel, J.G., Moraes, L.E., Bannink, A., and Dijkstra, J. (2019) Bayesian  
525 mechanistic modeling of thermodynamically controlled volatile fatty acid, hydrogen and  
526 methane production in the bovine rumen. *J Theor Biol* **480**: 150–165.
- 527 Machado, L., Magnusson, M., Paul, N.A., Kinley, R., de Nys, R., and Tomkins, N. (2016a) Dose-  
528 response effects of *Asparagopsis taxiformis* and *Oedogonium* sp. on in vitro  
529 fermentation and methane production. *J Appl Phycol* **28**: 1443–1452.
- 530 Machado, L., Magnusson, M., Paul, N.A., Kinley, R., de Nys, R., and Tomkins, N. (2016b)  
531 Identification of bioactives from the red seaweed *Asparagopsis taxiformis* that promote  
532 antimethanogenic activity in vitro. *J Appl Phycol* **28**: 3117–3126.
- 533 Machado, L., Magnusson, M., Paul, N.A., De Nys, R., and Tomkins, N. (2014) Effects of marine  
534 and freshwater macroalgae on in vitro total gas and methane production. *PLoS One* **9**:

- 535 e85289.
- 536 Machado, L., Tomkins, N., Magnusson, M., Midgley, D.J., de Nys, R., and Rosewarne, C.P.  
537 (2018) In Vitro Response of Rumen Microbiota to the Antimethanogenic Red Macroalga  
538 *Asparagopsis taxiformis*. *Microb Ecol* **75**: 811–818.
- 539 Maia, M.R.G., Fonseca, A.J.M., Oliveira, H.M., Mendonça, C., and Cabrita, A.R.J. (2016) The  
540 potential role of seaweeds in the natural manipulation of rumen fermentation and  
541 methane production. *Sci Rep* **6**: 32321.
- 542 Makkar, H.P.S., Tran, G., Heuzé, V., Giger-Reverdin, S., Lessire, M., Lebas, F., and Ankers, P.  
543 (2016) Seaweeds for livestock diets: A review. *Anim Feed Sci Technol* **212**: 1–17.
- 544 Mosey, F.E. (1983) Mathematical-Modeling of the Anaerobic-Digestion Process - Regulatory  
545 Mechanisms for the Formation of Short-Chain Volatile Acids from Glucose. *Water Sci*  
546 *Technol* **15**: 209–232.
- 547 Muñoz-Tamayo, R., Giger-Reverdin, S., and Sauvant, D. (2016) Mechanistic modelling of in  
548 vitro fermentation and methane production by rumen microbiota. *Anim Feed Sci*  
549 *Technol* **220**: 1–21.
- 550 Muñoz-Tamayo, R., Laroche, B., Leclerc, M., and Walter, E. (2009) IDEAS: A parameter  
551 identification toolbox with symbolic analysis of uncertainty and its application to  
552 biological modelling. In, *IFAC Proceedings Volumes.*, pp. 1271–1276.
- 553 Muñoz-Tamayo, R., Popova, M., Tillier, M., Morgavi, D.P., Morel, J.P., Fonty, G., and Morel-  
554 Desrosiers, N. (2019) Hydrogenotrophic methanogens of the mammalian gut:  
555 Functionally similar, thermodynamically different—A modelling approach. *PLoS One* **14**:  
556 e0226243.
- 557 Muñoz-Tamayo, R., Puillet, L., Daniel, J.B., Sauvant, D., Martin, O., Taghipoor, M., and Blavy,  
558 P. (2018) Review: To be or not to be an identifiable model. Is this a relevant question in  
559 animal science modelling? *Animal* **12**: 701–712.
- 560 Offner, A. and Sauvant, D. (2006) Thermodynamic modeling of ruminal fermentations. **55**:  
561 343–365.
- 562 Paul, N.A., De Nys, R., and Steinberg, P.D. (2006) Chemical defence against bacteria in the  
563 red alga *Asparagopsis armata*: Linking structure with function. *Mar Ecol Prog Ser* **306**:  
564 87–101.
- 565 Pavlostathis, S.G., Miller, T.L., and Wolin, M.J. (1990) Cellulose Fermentation by Continuous  
566 Cultures of *Ruminococcus-Albus* and *Methanobrevibacter-Smithii*. *Appl Microbiol*  
567 *Biotechnol* **33**: 109–116.
- 568 Puhakka, L., Jaakkola, S., Simpura, I., Kokkonen, T., and Vanhatalo, A. (2016) Effects of  
569 replacing rapeseed meal with fava bean at 2 concentrate crude protein levels on feed  
570 intake, nutrient digestion, and milk production in cows fed grass silage-based diets. *J*  
571 *Dairy Sci* **99**: 7993–8006.

- 572 Ramin, M. and Huhtanen, P. (2012) Development of an in vitro method for determination of  
573 methane production kinetics using a fully automated in vitro gas system-A modelling  
574 approach. *Anim Feed Sci Technol* **174**: 190–200.
- 575 Roque, B.M., Brooke, C.G., Ladau, J., Polley, T., Marsh, L.J., Najafi, N., et al. (2019) Effect of  
576 the macroalgae *Asparagopsis taxiformis* on methane production and rumen  
577 microbiome assemblage. *Anim Microbiome* **1:3**:
- 578 Roque, B.M., Salwen, J.K., Kinley, R., and Kebreab, E. (2019) Inclusion of *Asparagopsis armata*  
579 in lactating dairy cows' diet reduces enteric methane emission by over 50 percent. *J*  
580 *Clean Prod* **234**: 132–138.
- 581 Roque, B.M., Venegas, M., Kinley, R., DeNys, R., Neoh, T.L., Duarte, T.L., et al. (2020) Red  
582 seaweed (*Asparagopsis taxiformis*) supplementation reduces enteric methane by over  
583 80 percent in beef steers. *bioRxiv*.
- 584 St-Pierre, N.R. (2003) Reassessment of Biases in Predicted Nitrogen Flows to the Duodenum  
585 by NRC 2001. *J Dairy Sci* **86**: 344–350.
- 586 Stefenoni, H.A., Räisänen, S.E., Cueva, S.F., Wasson, D.E., Lage, C.F.A., Melgar, A., et al.  
587 (2021) Effects of the macroalga *Asparagopsis taxiformis* and oregano leaves on  
588 methane emission, rumen fermentation, and lactational performance of dairy cows. *J*  
589 *Dairy Sci*.
- 590 Ungerfeld, E.M. (2020) Metabolic Hydrogen Flows in Rumen Fermentation: Principles and  
591 Possibilities of Interventions. *Front Microbiol* **11**: 589.
- 592 Vanrolleghem, P.A., Vandaele, M., and Dochain, D. (1995) Practical identifiability of a  
593 biokinetic model of activated-sludge respiration. *Water Res* **29**: 2561–2570.
- 594 Walter, E. and Pronzato, L. (1996) On the identifiability and distinguishability of nonlinear  
595 parametric models. *Math Comput Simul* **42**: 125–134.
- 596 Wang, Y., Xu, Z., Bach, S.J., and McAllister, T.A. (2008) Effects of phlorotannins from  
597 *Ascophyllum nodosum* (brown seaweed) on in vitro ruminal digestion of mixed forage  
598 or barley grain. *Anim Feed Sci Technol* **145**: 375–395.
- 599 Wood, J.M., Kennedy, F.S., and Wolfe, R.S. (1968) The Reaction of Multihalogenated  
600 Hydrocarbons with Free and Bound Reduced Vitamin B12. *Biochemistry* **7**: 1707–1713.
- 601
